# Supplementary material for: The ion selectivity filter is not an activation gate in TRPV1-3 channels
Source: eLife journal article supplement (doi:10.7554/elife.51212), 2019-11-14
Supplement: supp [file elife-51212-supp-v1.zip]

## Sheet: Used
order	PDB ID	Protein name	DOI	species	abbreviation
1	3j5q	TRPV1	https://doi.org/10.1038/nature12823	Rattus norvegicus	Rn
2	5irx	TRPV1	https://doi.org/10.1038/nature17964	Rattus norvegicus	Rn
3	3j5p	TRPV1	https://doi.org/10.1038/nature12822	Rattus norvegicus	Rn
4	3j9j	TRPV1	https://doi.org/10.1038/nmeth.3541	Rattus norvegicus	Rn
5	5irz	TRPV1	https://doi.org/10.1038/nature17964	Rattus norvegicus	Rn
6	5is0	TRPV1	https://doi.org/10.1038/nature17964	Rattus norvegicus	Rn
7	6bo4	TRPV2	https://doi.org/10.1038/s41594-018-0168-8	Rattus norvegicus	Rn
8	6bo5	TRPV2	https://doi.org/10.1038/s41594-018-0168-8	Rattus norvegicus	Rn
9	6oo5	TRPV2	https://doi.org/10.7554/eLife.45779.001	Oryctolagus cuniculus	Oc
10	5an8	TRPV2	https://doi.org/10.1038/nsmb.3159	Oryctolagus cuniculus	Oc
11	5hi9	TRPV2	https://doi.org/10.1038/ncomms11130	Rattus norvegicus	Rn
12	6oo4	TRPV2	https://doi.org/10.7554/eLife.45779.001	Oryctolagus cuniculus	Oc
13	6oo3	TRPV2	https://doi.org/10.7554/eLife.45779.001	Oryctolagus cuniculus	Oc
14	6dvz	TRPV3	https://doi.org/10.1038/s41594-018-0108-7	Mus musculus	Mm
15	6mhw	TRPV3	https://doi.org/10.1038/s41467-018-07117-w	Homo sapiens	Hs
16	6mhx	TRPV3	https://doi.org/10.1038/s41467-018-07117-w	Homo sapiens	Hs
17	6ot2	TRPV3	https://doi.org/10.7554/eLife.47746.001	Homo sapiens	Hs
18	6dvw	TRPV3	https://doi.org/10.1038/s41594-018-0108-7	Mus musculus	Mm
19	6mho	TRPV3	https://doi.org/10.1038/s41467-018-07117-w	Homo sapiens	Hs
20	6mhs	TRPV3	https://doi.org/10.1038/s41467-018-07117-w	Homo sapiens	Hs
21	6dvy	TRPV3	https://doi.org/10.1038/s41594-018-0108-7	Mus musculus	Mm
22	6mhv	TRPV3	https://doi.org/10.1038/s41467-018-07117-w	Homo sapiens	Hs
23	6ot5	TRPV3	https://doi.org/10.7554/eLife.47746.001	Homo sapiens	Hs
24	6bbj	TRPV4	https://doi.org/10.1038/s41594-018-0037-5	Xenopus tropicalis	Xt
25	6dmr	TRPV5	https://doi.org/10.1038/s41467-018-06753-6	Oryctolagus cuniculus	Oc
26	6dmu	TRPV5	https://doi.org/10.1038/s41467-018-06753-6	Oryctolagus cuniculus	Oc
27	6dmw	TRPV5	https://doi.org/10.1038/s41467-018-06753-6	Oryctolagus cuniculus	Oc
28	6o1u	TRPV5	https://doi.org/10.1073/pnas.1820323116	Oryctolagus cuniculus	Oc
29	6o1n	TRPV5	https://doi.org/10.1073/pnas.1820323116	Oryctolagus cuniculus	Oc
30	6b5v	TRPV5	https://doi.org/10.1038/s41594-017-0009-1	Oryctolagus cuniculus	Oc
31	6o20	TRPV5	https://doi.org/10.1073/pnas.1820323116	Oryctolagus cuniculus	Oc
32	6o1p	TRPV5	https://doi.org/10.1073/pnas.1820323116	Oryctolagus cuniculus	Oc
33	6bo8	TRPV6	https://doi.org/10.1038/nature25182	Homo sapiens	Hs
34	6bo9	TRPV6	https://doi.org/10.1038/nature25182	Homo sapiens	Hs
35	6d7s	TRPV6	https://doi.org/10.1038/s41467-018-04828-y	Homo sapiens	Hs
36	6bob	TRPV6	https://doi.org/10.1038/nature25182	Rattus norvegicus	Rn
37	6d7v	TRPV6	https://doi.org/10.1038/s41467-018-04828-y	Rattus norvegicus	Rn
38	6e2f	TRPV6	https://doi.org/10.1126/sciadv.aau6088	Homo sapiens	Hs
39	5wo7	TRPV6	https://doi.org/10.1038/s41598-017-10993-9	Rattus norvegicus	Rn
40	5wo9	TRPV6	https://doi.org/10.1038/s41598-017-10993-9	Rattus norvegicus	Rn
41	5woa	TRPV6	https://doi.org/10.1038/s41598-017-10993-9	Rattus norvegicus	Rn
42	6boa	TRPV6	https://doi.org/10.1038/nature25182	Homo sapiens	Hs
43	6d7o	TRPV6	https://doi.org/10.1038/s41467-018-04828-y	Rattus norvegicus	Rn
44	6d7p	TRPV6	https://doi.org/10.1038/s41467-018-04828-y	Rattus norvegicus	Rn
45	6d7q	TRPV6	https://doi.org/10.1038/s41467-018-04828-y	Rattus norvegicus	Rn
46	6d7t	TRPV6	https://doi.org/10.1038/s41467-018-04828-y	Homo sapiens	Hs
47	6d7x	TRPV6	https://doi.org/10.1038/s41467-018-04828-y	Rattus norvegicus	Rn
48	6e2g	TRPV6	https://doi.org/10.1126/sciadv.aau6088	Rattus norvegicus	Rn
49	3j9p	TRPA1	https://doi.org/10.1038/nature14367	Homo sapiens	Hs
50	5zbg	TRPC3	https://doi.org/10.1038/s41422-018-0038-2	Homo sapiens	Hs
51	6cud	TRPC3	https://doi.org/10.7554/eLife.36852	Homo sapiens	Hs
52	6g1k	TRPC4	https://doi.org/10.7554/eLife.36615.001	Danio rerio	Dr
53	5yx9	TRPC6	https://doi.org/10.1038/s41422-018-0038-2	Homo sapiens	Hs
54	6drj	TRPM2	https://doi.org/10.1038/s41586-018-0558-4	Danio rerio	Dr
55	6co7	TRPM2	https://doi.org/10.7554/eLife.36409.001	Nematostella vectensis	Nv
56	6drk	TRPM2	https://doi.org/10.1038/s41586-018-0558-4	Danio rerio	Dr
57	6mix	TRPM2	https://doi.org/10.1126/science.aav4809	Homo sapiens	Hs
58	5wp6	TRPM4	https://doi.org/10.1038/nature24674	Homo sapiens	Hs
59	6bcj	TRPM4	https://doi.org/10.1038/nature24997	Mus musculus	Mm
60	6bcl	TRPM4	https://doi.org/10.1038/nature24997	Mus musculus	Mm
61	6bco	TRPM4	https://doi.org/10.1038/nature24997	Mus musculus	Mm
62	6bcq	TRPM4	https://doi.org/10.1038/nature24997	Mus musculus	Mm
63	6bqr	TRPM4	https://doi.org/10.1126/science.aar4510	Homo sapiens	Hs
64	6bqv	TRPM4	https://doi.org/10.1126/science.aar4510	Homo sapiens	Hs
65	6bwi	TRPM4	https://doi.org/10.1073/pnas.1722038115	Homo sapiens	Hs
66	5zx5	TRPM7	https://doi.org/10.1073/pnas.1810719115	Mus musculus	Mm
67	6bwf	TRPM7	https://doi.org/10.1073/pnas.1810719115	Mus musculus	Mm
68	6nr3	TRPM8	https://doi.org/10.1126/science.aav9334	Ficedula albicollis	Fa
69	6bpq	TRPM8	https://doi.org/10.1126/science.aan4325	Ficedula albicollis	Fa
70	6nr2	TRPM8	https://doi.org/10.1126/science.aav9334	Ficedula albicollis	Fa
71	6nr4	TRPM8	https://doi.org/10.1126/science.aav9334	Ficedula albicollis	Fa
72	5wj9	TRPML1	https://doi.org/10.1038/nature24036	Homo sapiens	Hs
73	6e7z	TRPML1	https://doi.org/10.1038/s41467-018-06493-7	Homo sapiens	Hs
74	5wj5	TRPML1	https://doi.org/10.1038/nature24036	Homo sapiens	Hs
75	5wpq	TRPML1	https://doi.org/10.1038/nature24035	Mus musculus	Mm
76	5wpt	TRPML1	https://doi.org/10.1038/nature24035	Mus musculus	Mm
77	5wpv	TRPML1	https://doi.org/10.1038/nature24035	Mus musculus	Mm
78	6e7p	TRPML1	https://doi.org/10.1038/s41467-018-06493-7	Homo sapiens	Hs
79	6e7y	TRPML1	https://doi.org/10.1038/s41467-018-06493-7	Homo sapiens	Hs
80	6ayf	TRPML3	https://doi.org/10.1038/nsmb.3502	Homo sapiens	Hs
81	6ayg	TRPML3	https://doi.org/10.1038/nsmb.3502	Homo sapiens	Hs
82	5w3s	TRPML3	https://doi.org/10.1038/nature24055	Callithrix jacchus	Cj
83	6aye	TRPML3	https://doi.org/10.1038/nsmb.3502	Homo sapiens	Hs
84	6d1w	TRPP1	https://doi.org/10.1038/s41467-018-04586-x	Homo sapiens	Hs
85	5mke	TRPP1	https://doi.org/10.1038/nsmb.3357	Homo sapiens	Hs
86	5k47	TRPP1	https://doi.org/10.1038/nsmb.3343	Homo sapiens	Hs
87	5mkf	TRPP1	https://doi.org/10.1038/nsmb.3357	Homo sapiens	Hs
88	5z1w	TRPP2	https://doi.org/10.1038/s41467-018-03606-0	Mus musculus	Mm
89	6du8	TRPP2	https://doi.org/10.7554/eLife.36931.001	Homo sapiens	Hs
90	5t4d	TRPP2	https://doi.org/10.1016/j.cell.2016.09.048	Homo sapiens	Hs
91	2r9r	Kv	https://doi.org/10.1038/nature06265	Rattus norvegicus	Rn
92	3rvy	Nav	https://doi.org/10.1038/nature10238	Arcobacter butzleri	Ab

## Sheet: Not Used
PDB ID	Why exclude	Protein name	Species	UniProt ID	method	details	Enforce Chain Order (counterclockwise, from extracellular view)	Chain1	Chain2	Chain3	Chain4	Start	Stop	Resolution (A)	structure source	family	ligand PDB ID	ligand names	tm1_start	tm1_stop	tm2_start	tm2_stop	tm3_start	tm3_stop	tm4_start	tm4_stop	tm5_start	tm5_stop	tm6_start	tm6_stop
5wo6	not domain-swapped		Rattus norvegicus	Q9R186		TRPV6 channel, monomer, structure 3	ADCB							3.31	PDB biological assembly
5iwk	not domain-swapped		Rattus norvegicus	Q9R186	x-ray	TRPV6 channel, tetramer, structure 1	ADBC	A	D	B	C	267	607	3.25	OPM	TRPV	ca, dtb		328	348	382	407	424	443	449	468	488	511	552	573
5iwp	not domain-swapped	TRPV6	Rattus norvegicus	Q9R186	x-ray	TRPV6 (Ca)								3.65	OPM	TRPV	ca, dtb		328	348	382	407	424	443	449	468	448	511	552	573
5iwr	not domain-swapped	TRPV6	Rattus norvegicus	Q9R186	x-ray	TRPV6 (Ba)								3.85	OPM	TRPV	dtb, ba
5iwt	not domain-swapped	TRPV6	Rattus norvegicus	Q9R186	x-ray	TRPV6 (Gd)								3.8	OPM	TRPV	dtb, gd
6djr	resolution worse than 5A		?	?	cryo-EM	TRPC3								5.8	PDB	TRPC	unk
5ye2	resolution worse than 5A		Mus musculus	Q99J21	cryo-EM	TRPML1								5.8	PDB	TRPML	none
5ye5	resolution worse than 5A		Mus musculus	Q99J21	cryo-EM	TRPML1								5.8	PDB	TRPML	nag
5ydz	resolution worse than 5A		Mus musculus	Q99J21	cryo-EM	TRPML1								5.8	PDB	TRPML	none
5ye1	resolution worse than 5A		Mus musculus	Q99J21	cryo-EM	TRPML1								5.8	PDB	TRPML	none
6c8g	resolution worse than 5A		Xenopus tropicalis	F7BWY7	x-ray	TRPV4 channel (Ba)								6.31	PDB	TRPV	ba
6c8f	resolution worse than 5A		Xenopus tropicalis	F7BWY7	x-ray	TRPV4 channel (Cs)								6.5	PDB	TRPV	cs
6c8h	resolution worse than 5A		Xenopus tropicalis	F7BWY7	x-ray	TRPV4 channel (Gd)								6.5	PDB	TRPV	gd
5wo8	not domain-swapped	TRPV6	Rattus norvegicus	Q9R186	x-ray	TRPV6								3.4	PDB biological assembly	TRPV	ca, dtb		328	347	382	404	421	444	448	468	484	507	555	578			35	17	4	16	48
